# Supplementary material for: pH-gated bidirectional nanoassembly switches: self-ratiometric d -penicillamine sensing via AIE-active Au( i )-TCEP-Cd( ii ) coordination dynamics
Source: Royal Society of Chemistry journal article supplement (doi:10.1039/d5ay00899a), 2025-01-01
Supplement: d5ay00899a1.pdf [file d5ay00899a1.pdf]

## Supporting Information

# **pH-Gated Bidirectional Nanoassembly Switches: Self-Ratiometric D-Penicillamine Sensing via AIE- Active Au(I)-TCEP-Cd(II) Coordination Dynamics**

Kunyang Li, †<sup>ab</sup> Yelan Xiao, †<sup>ab</sup> Yafang Sun, <sup>ab</sup> Zhi He, <sup>ab</sup> Jiarong Tian, <sup>ab</sup> Lei Su, <sup>ab</sup> Xueji Zhang <sup>ab</sup> and Tong Shu\*<sup>ab</sup>

<sup>a</sup> Shenzhen Key Laboratory for Nano-Biosensing Technology, School of Biomedical Engineering, Shenzhen University Medical School, Shenzhen University, Shenzhen 518060, China

<sup>b</sup> Marshall Laboratory of Biomedical Engineering, Shenzhen University Medical School, Shenzhen University, Shenzhen 518060, China

‡Kunyang Li and Yelan Xiao contributed equally to this work.

*\*Correspondence to:*

Tong Shu

shutong@szu.edu.cn

## Table of Contents

|                                    |     |
|------------------------------------|-----|
| <b>1. Supporting Figures</b> ..... | S3  |
| Figures S1-S20 .....               | S3  |
| <b>2. Supporting Table</b> .....   | S22 |
| Table S1-S2 .....                  | S22 |

## 1. Supporting Figures

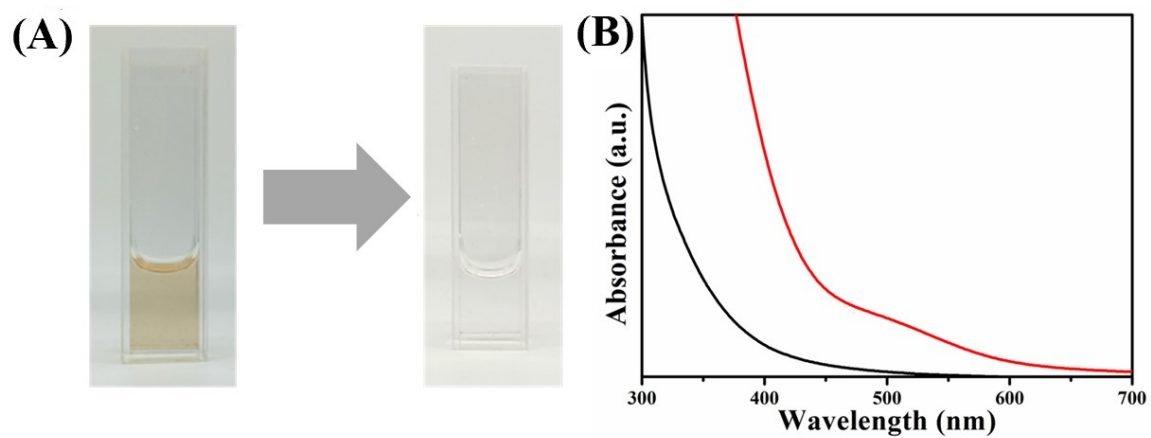

**Fig. S1** (A) Photos of AuNCs@BSA solution before (left) and after (right) reacting with TCEP at pH 8. (B) UV-vis absorption spectra AuNCs@BSA solution before (red line) and after (black line) reacting with TCEP.

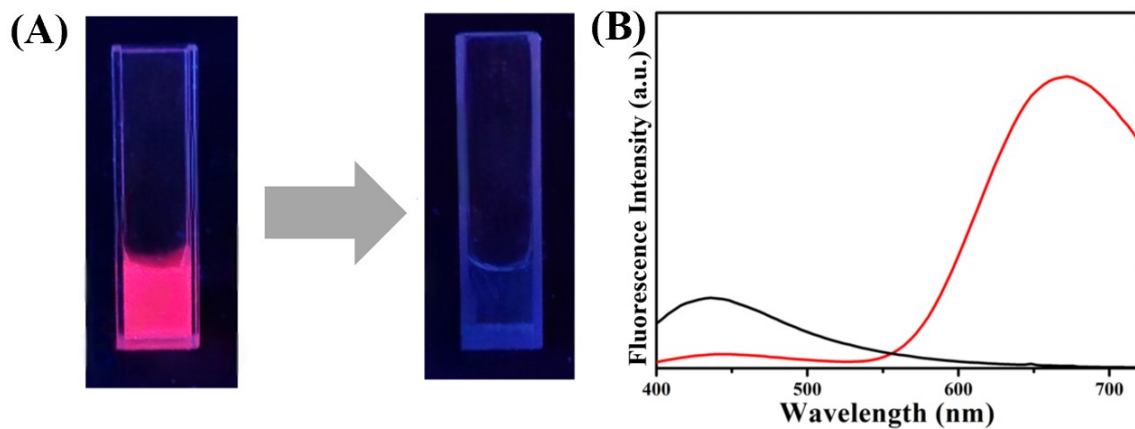

**Fig. S2** (A) Photos of AuNCs@BSA solution before (left) and after (right) reacting with TCEP at pH 8 under UV light. (B) Luminescent spectra of AuNCs@BSA solution before (red line) and after (black line) reacting with TCEP.

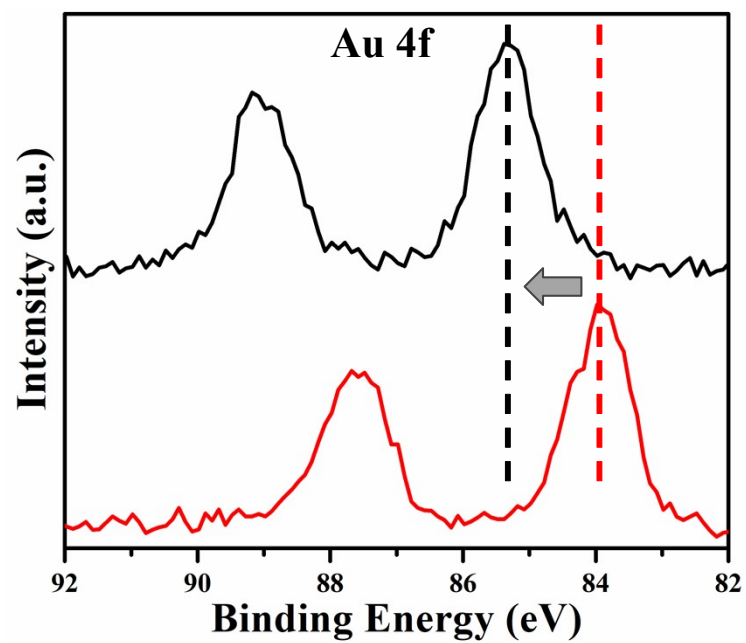

**Fig. S3** XPS spectra of Au4f for the AuNCs@BSA before (red line) and after (black line) reacting with TCEP.

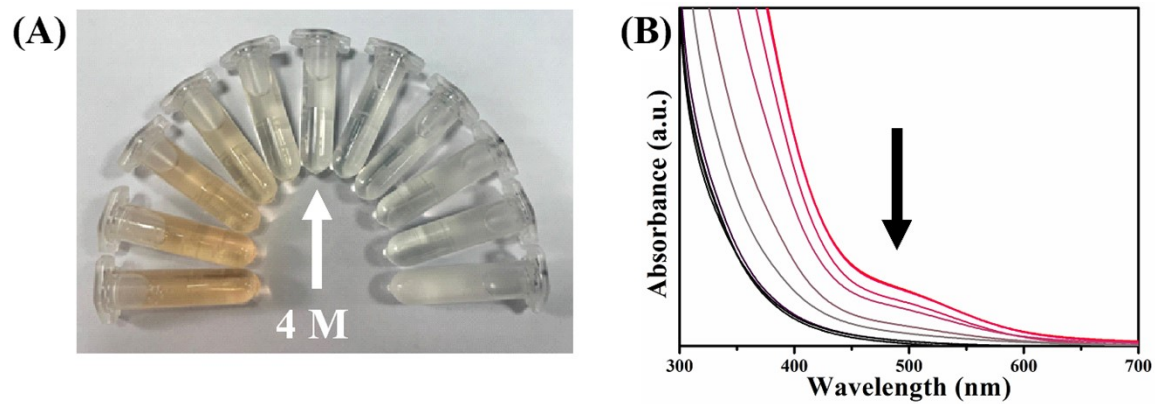

**Fig. S4** Photo of samples under visible light (A) and the corresponding UV-vis absorption spectra (B) for different TCEP doses of AuNCs@BSA (the change in color from the red line to the black line indicates that the dose of TCEP is constantly increasing).

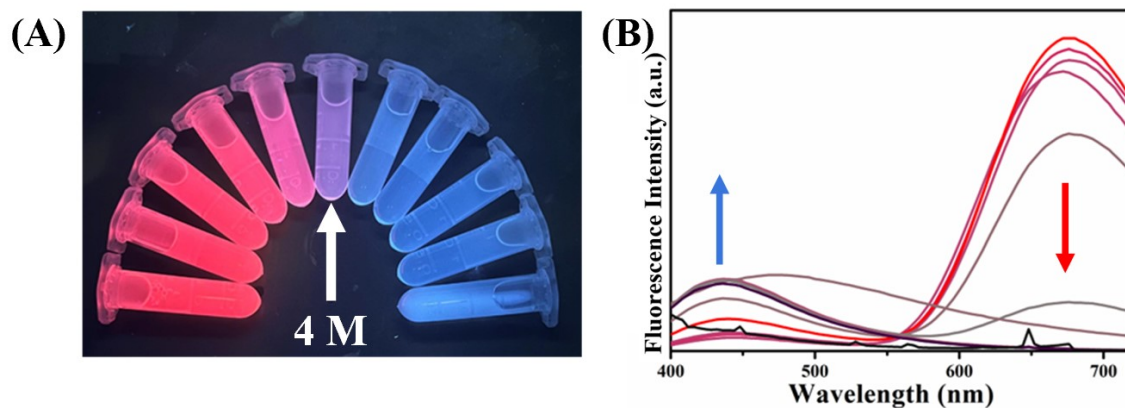

**Fig. S5** Photo in the UV box (A) (TCEP content added from left to right, the content is 0, 0.5, 1, 2, 3, 4, 6, 8, 9, 18, 30 M) and fluorescence emission spectra (B) for different TCEP doses of AuNCs@BSA (the change in color from the red line to the black line indicates that the dose of TCEP is constantly increasing).

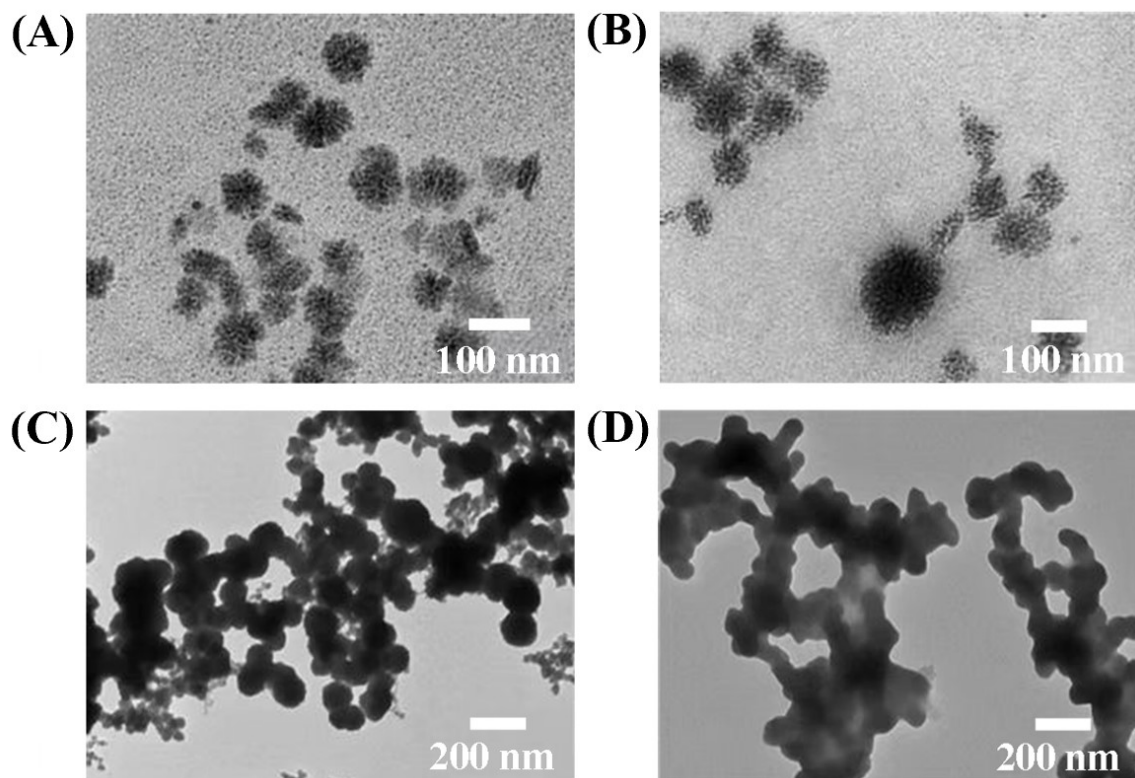

**Fig. S6** TEM images of different concentration of  $\text{Cd}^{2+}$ : (A) 10 mM, (B) 16 mM, (C) 30 mM, (D) 60 mM.



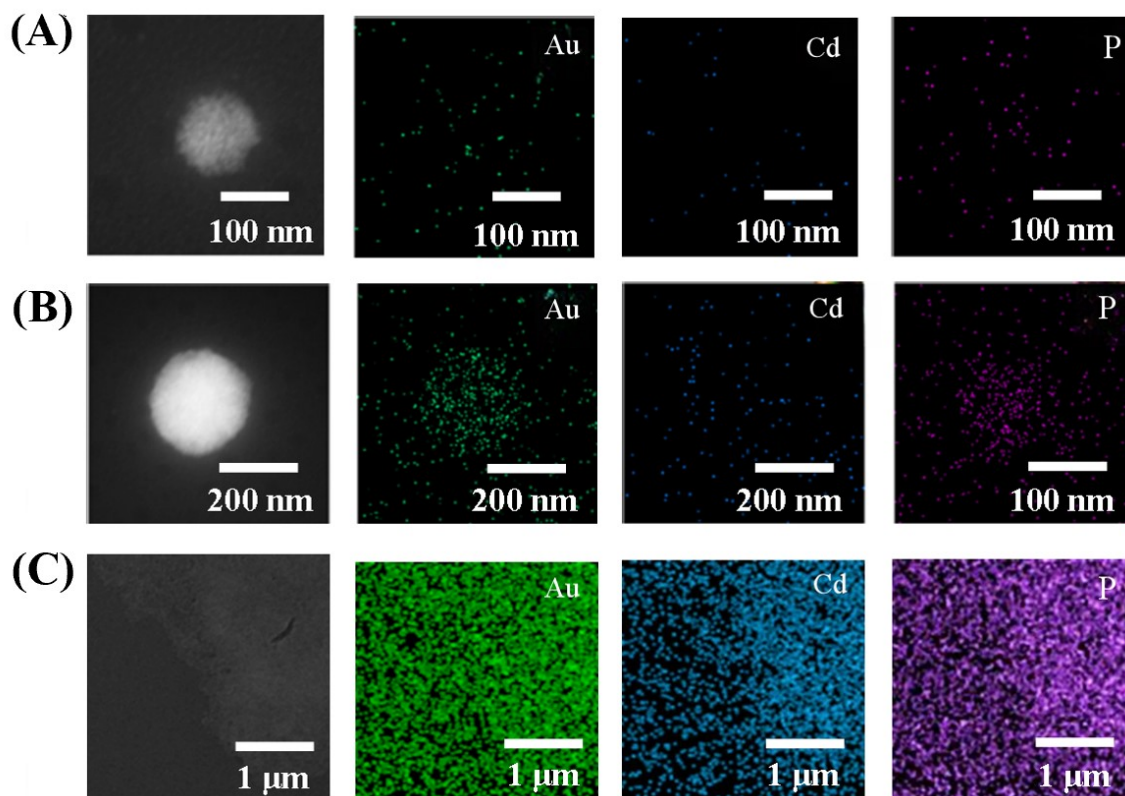

**Fig. S7** Distribution of Au, Cd, and P elements in different materials: (A) 100 nm snowflake like material. (B) 120 nm circular material. (C) supramolecular aggregation material.

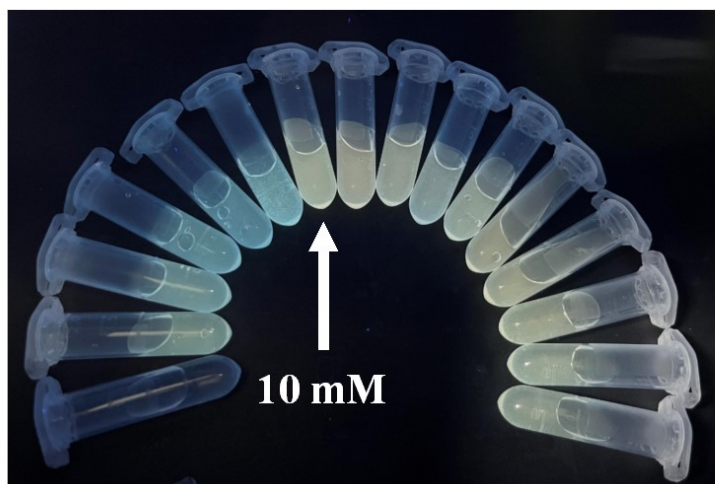

**Fig. S8** Photos of Au(I)-TCEP with different Cd<sup>2+</sup> concentrations in UV box (from left to right, the content is 0, 1, 3, 4, 6, 8, 10, 12, 14, 16, 20, 24, 30, 40, 50, 60 mM).

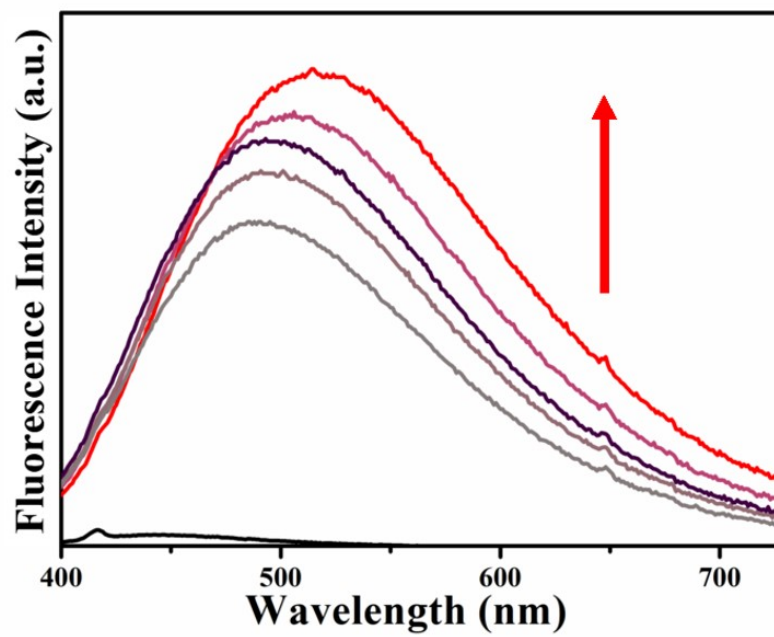

**Fig. S9** Fluorescence emission spectra of Au(I)-TCEP solutions with the Cd<sup>2+</sup> concentration of 0, 1, 3, 4, 6, 8 mM.

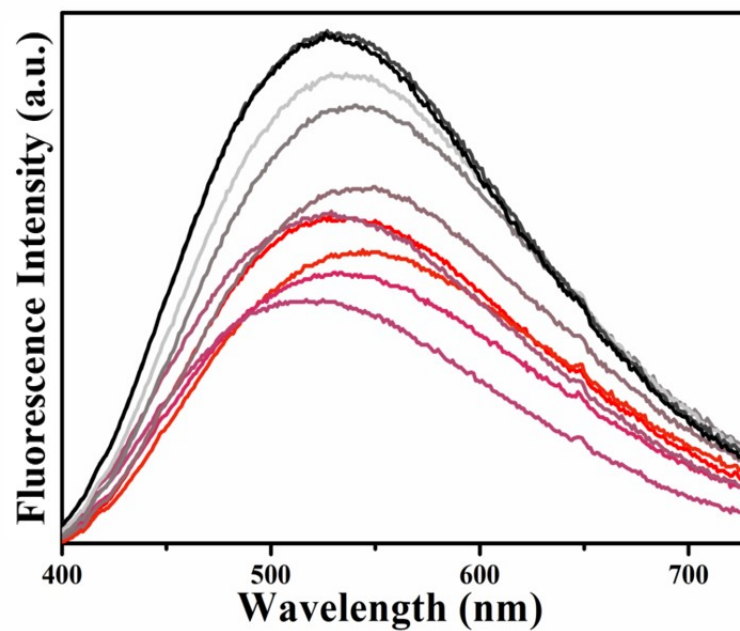

**Fig. S10** Fluorescence emission spectra of Au(I)-TCEP with the Cd<sup>2+</sup> concentrations in the range of 10-60 mM.

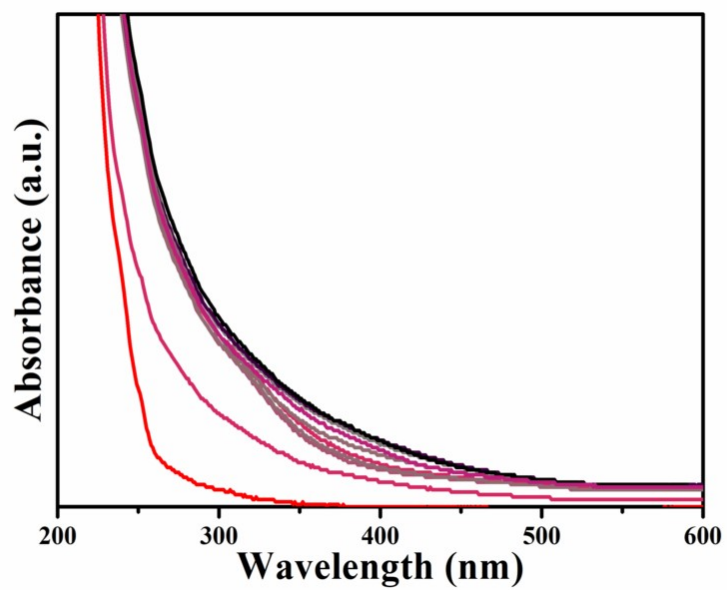

**Fig. S11** UV absorption spectra of Au(I)-TCEP with different Cd<sup>2+</sup> concentrations (red to black lines indicate a gradual increase in Cd concentrations).

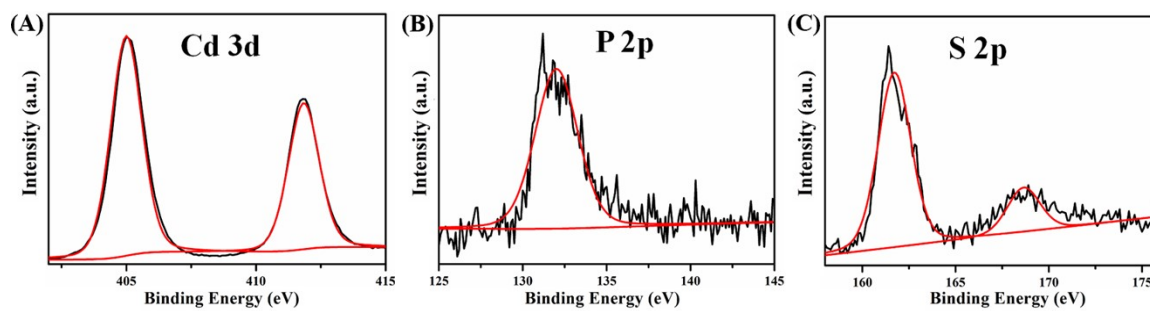

**Fig. S12** XPS spectra of different elements in Au(I)-TCEP-Cd(II): (A) Cd, (B) P, (C)

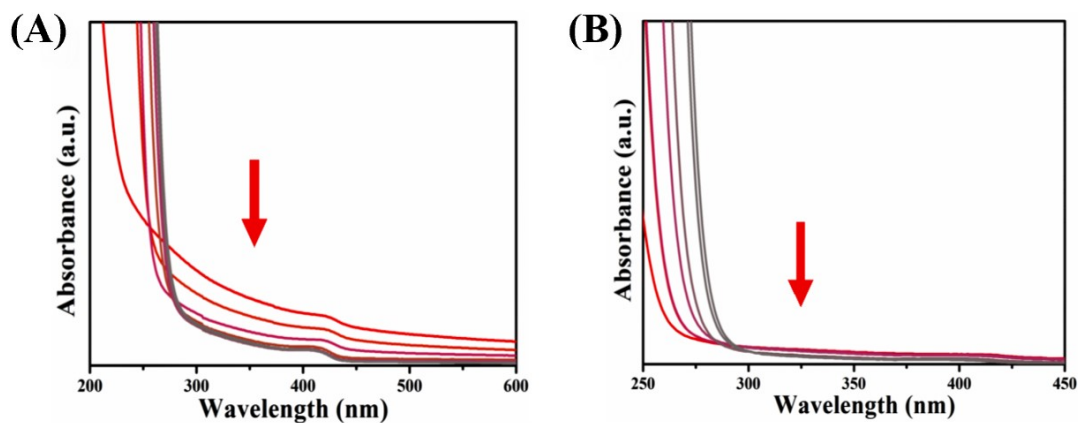

**Fig. S13** (A) UV absorbance changes of Au(I)-TCEP-Cd(II) nanoaggregates with increasing DPA concentration at pH 7 (from red to black indicating a gradual increase in DPA concentration). (B) UV absorbance changes pf Au(I)-TCEP-Cd(II) nanoaggregates with increasing DPA concentration at pH 9 (from red to black indicating a gradual increase in DPA concentration).

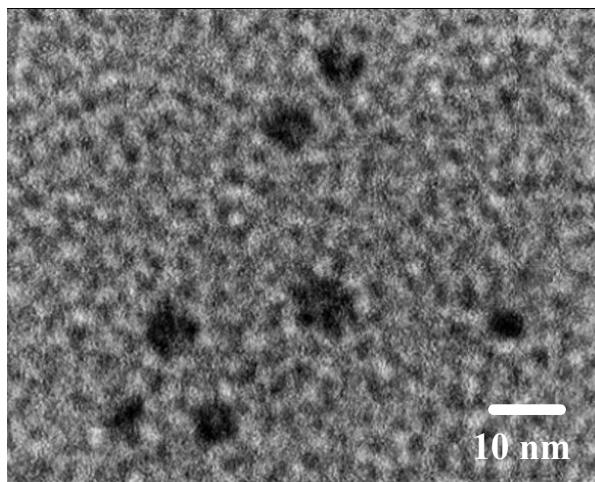

**Fig. S14** TEM image of Au(I)-TCEP-Cd(II) after adding DPA (pH 7).



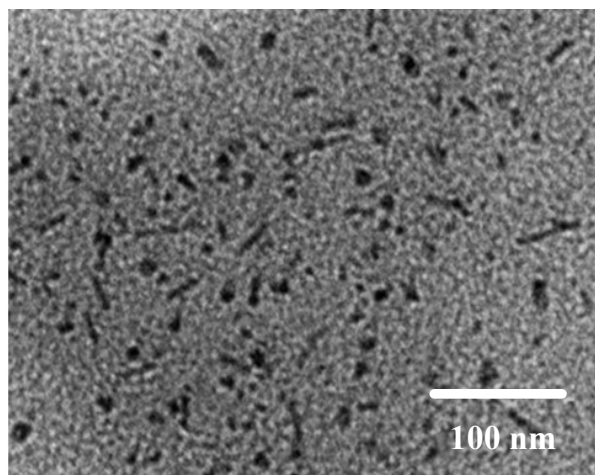

**Fig. S15** TEM image of Au(I)-TCEP-Cd(II) after adding DPA (pH 9)

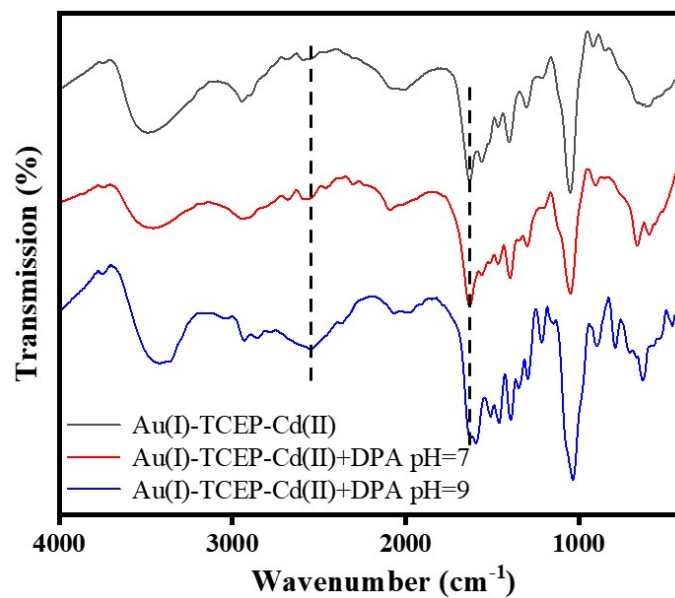

**Fig. S16** Comparative FTIR spectra of Au(I)-TCEP-Cd(II) before and after DPA addition (pH 7 and pH 9)

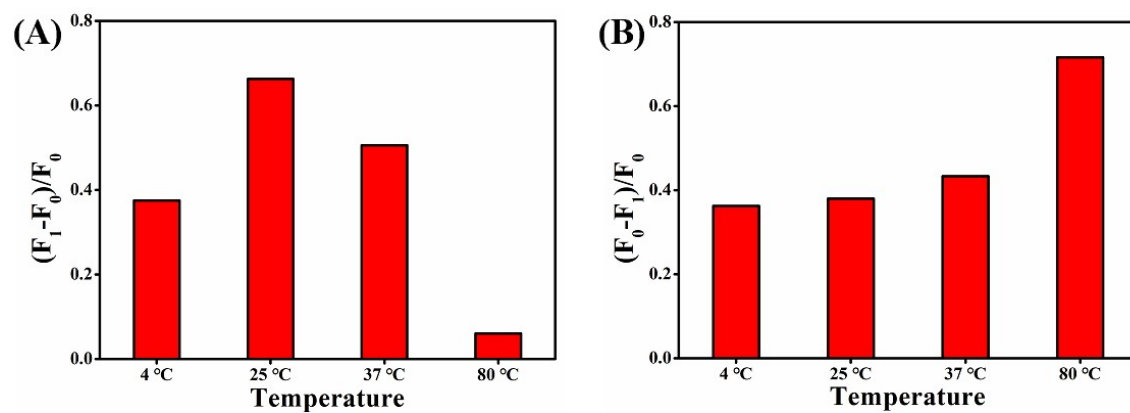

**Fig. S17** Detection performance of DPA by Au(I)-TCEP-Cd(II) under different temperatures at pH 7 (A) and pH 9 (B).

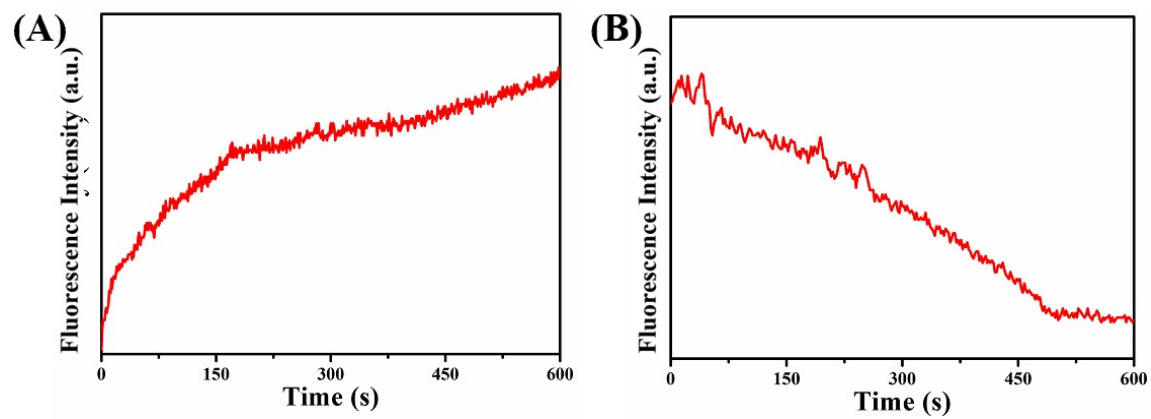

**Fig. S18** Detection performance of DPA by Au(I)-TCEP-Cd(II) with different times at pH 7 (A) and pH 9 (B).

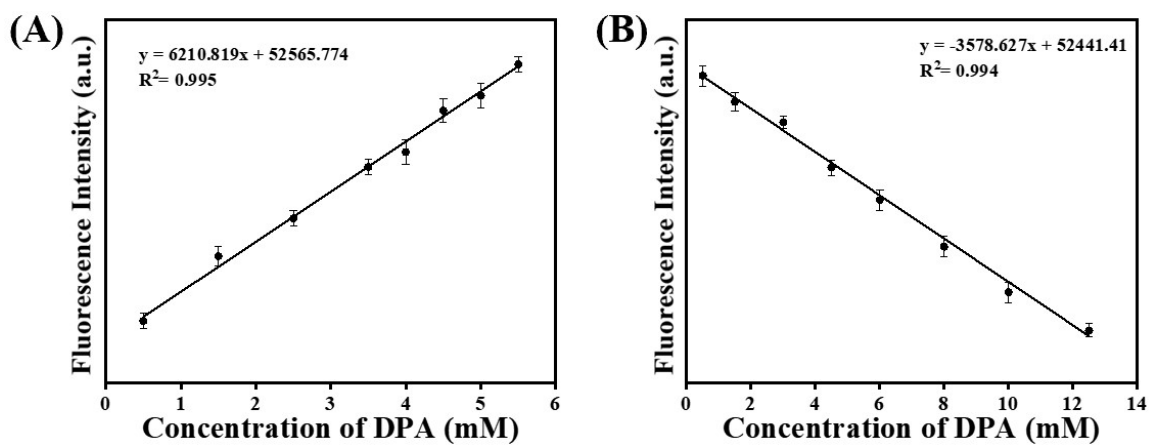

**Fig. S19** Fluorescence intensity of Au(I)-TCEP-Cd(II) nanoaggregates as a function of DPA concentration at pH 7 (A) and pH 9 (B).

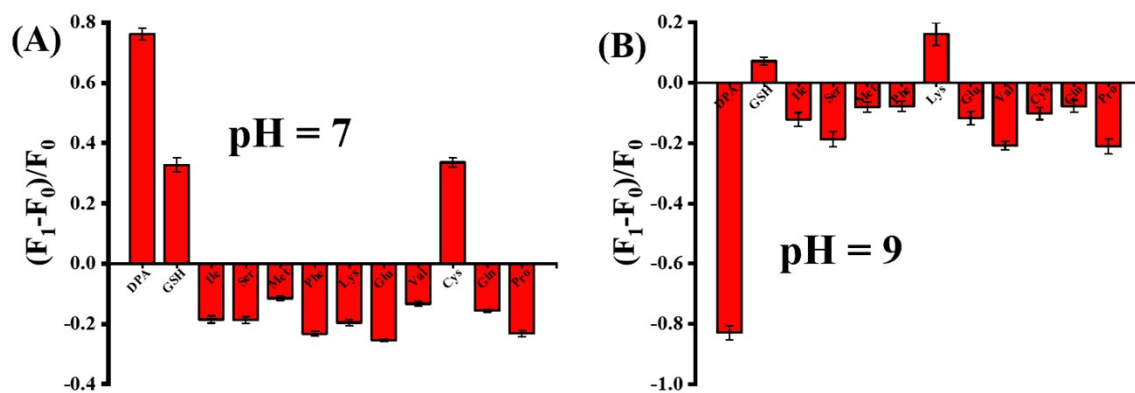

**Fig. S20** Selectivity of Au(I)-TCEP-Cd(II) nanoaggregates for various biomolecules at pH 7 (A) and pH 9 (B).

## 2. Supporting Table

**Table S1** Comparison of different methods for the detection of DPA.

| Mode                       | System                                 | Adopted Dual-<br>Mode Verification | Detection Time | Reference |
|----------------------------|----------------------------------------|------------------------------------|----------------|-----------|
| Fluorometry<br>Colorimetry | Cl <sup>-</sup> -Cu <sup>2+</sup> -OPD | YES                                | 45 min         | [31]      |
| Colorimetry                | Cu-NC                                  | NO                                 | 30 min         | [32]      |
| Fluorometry                | DNA-AgNCs                              | NO                                 | 20 min         | [33]      |
| Ratiometry                 | N-Ti <sub>3</sub> C <sub>2</sub> QDs   | YES                                | 3.5 h          | [34]      |
| Ratiometry                 | CDs                                    | YES                                | 3 h            | [35]      |
| Ratiometry                 | Au(I)-TCEP-Cd(II)                      | YES                                | 8 min          | This work |

**Table S2** Recovery of DPA from serum sample spiked with 2.0 mM DPA

| Entry | Serum sample (pH) | Concentration DPA added (mM) | Concentration DPA found (mM) | Recovery % |
|-------|-------------------|------------------------------|------------------------------|------------|
| 1     | 7                 | 2.00                         | 1.89                         | 94.5%      |
| 2     | 7                 | 2.00                         | 1.95                         | 97.5%      |
| 3     | 7                 | 2.00                         | 1.90                         | 95.0%      |
| 4     | 9                 | 2.00                         | 1.85                         | 92.5%      |
| 5     | 9                 | 2.00                         | 1.89                         | 94.5%      |
| 6     | 9                 | 2.00                         | 1.82                         | 91.0%      |
